# Supplementary material
Source: Springer Nature journal article supplement (https://www.springermedizin.de/resource/supplementary/12885_2012_3852_MOESM1_ESM.pdf/9464618)

Estimated probability of surv.

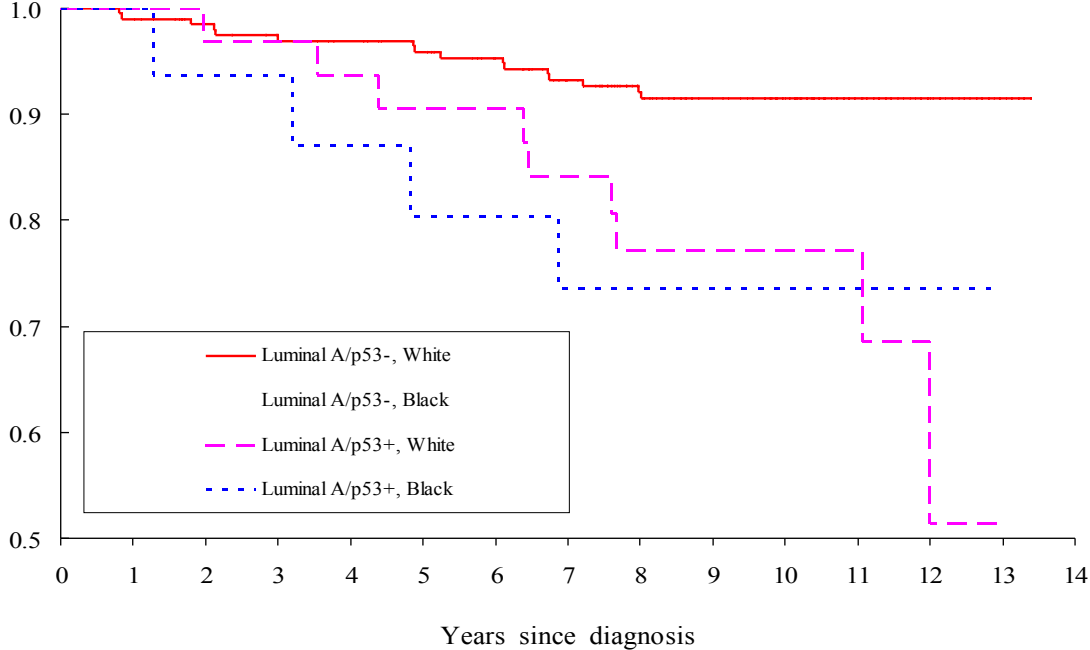

Supplement: MOESM1 [file 9464618]
